# Supplementary material for: Extra-foveal Processing of Object Semantics Guides Early Overt Attention During Visual Search
Source: Springer Nature journal article supplement (doi:10.3758/s13414-019-01906-1), 2019-12-02
Supplement: MOESM3 [file 13414_2019_1906_MOESM3_ESM.pdf]

### Supplemental Material C

#### List of Target-Present and -Absent Experimental Trials for Each Set Size by Semantic

#### Relatedness Condition

| Condition | Target name                 |               | Distractor object     |                   |                    |
|-----------|-----------------------------|---------------|-----------------------|-------------------|--------------------|
|           | Present-trials <sup>a</sup> | Absent-trials | Set size 5            |                   | Set size 7         |
|           |                             |               | Set size 3            |                   |                    |
| Related   | shark                       | prawn         | crab, squid           | dolphin, starfish | oyster, swordfish  |
| Unrelated |                             |               | shirt, trousers       | hat, scarf        | shoe, sock         |
| Related   | raspberry                   | banana        | pineapple, melon      | pear, mango       | lemon, avocado     |
| Unrelated |                             |               | rhinoceros, tiger     | giraffe, panda    | cheetah, squirrel  |
| Related   | bowl                        | colander      | blender, microwave    | fridge, sponge    | spatula, funnel    |
| Unrelated |                             |               | skunk, zebra          | porcupine, turtle | bear, moose        |
| Related   | bed                         | dresser       | mattress, pillow      | candle, lamp      | couch, fireplace   |
| Unrelated |                             |               | cauliflower, potato   | cucumber, lettuce | cabbage, carrot    |
| Related   | basketball                  | treadmill     | baseball, volleyball  | skate, football   | paddle, skis       |
| Unrelated |                             |               | harmonica, tambourine | banjo, cymbals    | accordion, drum    |
| Related   | plunger                     | drill         | screwdriver, hammer   | shovel, wrench    | wheelbarrow, axe   |
| Unrelated |                             |               | necklace, bracelet    | bag, wallet       | ring, glasses      |
| Related   | knee                        | nose          | elbow, leg            | foot, shoulder    | arm, hand          |
| Unrelated |                             |               | cello, piano          | flute, trombone   | saxophone, trumpet |
| Related   | tomato                      | mushroom      | celery, onion         | courgette, garlic | aubergine, olive   |
| Unrelated |                             |               | curtain, globe        | bench, mirror     | aquarium, painting |
| Related   | violin                      | harp          | cello, piano          | flute, trombone   | saxophone, trumpet |
| Unrelated |                             |               | pineapple, melon      | pear, mango       | lemon, avocado     |
| Related   | owl                         | chicken       | eagle, vulture        | duck, pigeon      | ostrich, parrot    |
| Unrelated |                             |               | truck, motorcycle     | helicopter, bus   | boat, train        |

*Supplemental material continues*

| Condition | Target name    |                           | Distractor object    |                       |                     |
|-----------|----------------|---------------------------|----------------------|-----------------------|---------------------|
|           | Present-trials | Absent-trials             | Set size 5           |                       | Set size 7          |
|           |                |                           | Set size 3           |                       |                     |
| Related   | sunglasses     | watch                     | necklace, bracelet   | bag, wallet           | ring, glasses       |
| Unrelated |                |                           | lipstick, perfume    | deodorant, toothbrush | razor, tweezers     |
| Related   | armour         | arrow/shield <sup>b</sup> | cannon, bullet       | knife, sword          | tank, spear         |
| Unrelated |                |                           | mattress, pillow     | candle, lamp          | couch, fireplace    |
| Related   | comb           | soap                      | lipstick, perfume    | deodorant, toothbrush | razor, tweezers     |
| Unrelated |                |                           | screwdriver, hammer  | shovel, wrench        | wheelbarrow, axe    |
| Related   | bee            | cockroach                 | butterfly, ant       | dragonfly, spider     | ladybird, scorpion  |
| Unrelated |                |                           | baseball, volleyball | skate, football       | paddle, skis        |
| Related   | pen            | calculator                | crayon, pencil       | folder, envelope      | notebook, scissors  |
| Unrelated |                |                           | plate, spoon         | knife, ladle          | broom, mop          |
| Related   | balloon        | swing                     | kite, tricycle       | doll, skateboard      | trampoline, scooter |
| Unrelated |                |                           | elbow, leg           | foot, shoulder        | arm, hand           |
| Related   | laptop         | television                | printer, scanner     | camera, telephone     | hoover, hairdryer   |
| Unrelated |                |                           | belt, jeans          | glove, tie            | sandal, slipper     |
| Related   | shorts         | coat                      | shirt, trousers      | hat, scarf            | shoe, sock          |
| Unrelated |                |                           | crab, squid          | dolphin, starfish     | oyster, swordfish   |
| Related   | car            | airplane                  | truck, motorcycle    | helicopter, bus       | boat, train         |
| Unrelated |                |                           | pot, teapot          | apron, kettle         | mixer, toaster      |
| Related   | elephant       | mouse                     | rhinoceros, tiger    | giraffe, panda        | cheetah, squirrel   |
| Unrelated |                |                           | cherries, plum       | orange, peach         | lime, grapes        |
| Related   | boot           | jacket                    | belt, jeans          | glove, tie            | sandal, slipper     |
| Unrelated |                |                           | eagle, vulture       | duck, pigeon          | ostrich, parrot     |

*Supplemental material continues*

| Condition | Target name    |               | Distractor object     |                   |                     |
|-----------|----------------|---------------|-----------------------|-------------------|---------------------|
|           | Present-trials | Absent-trials | Set size 7            |                   |                     |
|           |                |               | Set size 5            |                   |                     |
|           |                |               | Set size 3            |                   |                     |
| Related   | mug            | tray          | pot, teapot           | apron, kettle     | mixer, toaster      |
| Unrelated |                |               | butterfly, ant        | dragonfly, spider | ladybird, scorpion  |
| Related   | stool          | armchair      | chair, table          | desk, vase        | shelf, bookshelf    |
| Unrelated |                |               | flamingo, penguin     | peacock, pelican  | rooster, turkey     |
| Related   | broccoli       | pumpkin       | cauliflower, potato   | cucumber, lettuce | cabbage, carrot     |
| Unrelated |                |               | kite, tricycle        | doll, skateboard  | trampoline, scooter |
| Related   | guitar         | clarinet      | harmonica, tambourine | banjo, cymbals    | accordion, drum     |
| Unrelated |                |               | lizard, crocodile     | hyena, monkey     | fox, lion           |
| Related   | seagull        | swan          | flamingo, penguin     | peacock, pelican  | rooster, turkey     |
| Unrelated |                |               | blender, microwave    | fridge, sponge    | spatula, funnel     |
| Related   | strawberry     | apple         | cherries, plum        | orange, peach     | lime, grapes        |
| Unrelated |                |               | pig, sheep            | cat, dog          | bull, wolf          |
| Related   | cow            | horse         | pig, sheep            | cat, dog          | bull, wolf          |
| Unrelated |                |               | celery, onion         | courgette, garlic | aubergine, olive    |
| Related   | kangaroo       | rabbit        | lizard, crocodile     | hyena, monkey     | fox, lion           |
| Unrelated |                |               | printer, scanner      | camera, telephone | hoover, hairdryer   |
| Related   | fork           | pan           | plate, spoon          | knife, ladle      | broom, mop          |
| Unrelated |                |               | crayon, pencil        | folder, envelope  | notebook, scissors  |
| Related   | clock          | rug           | curtain, globe        | bench, mirror     | aquarium, painting  |
| Unrelated |                |               | cannon, bullet        | knife, sword      | tank, spear         |
| Related   | gorilla        | hippopotamus  | skunk, zebra          | porcupine, turtle | bear, moose         |
| Unrelated |                |               | chair, table          | desk, vase        | shelf, bookshelf    |

*Note.*

<sup>a</sup>The 32 critical objects are listed in the target name column for target-present trials.

<sup>b</sup>Shield replaced arrow as target name for target-absent trials in set size 7.
